# Supplementary material
Source: PubMed Central journal article supplement (PMC7549363)
Supplement: JB.00342-20-s0001.pdf [file JB.00342-20-s0001.pdf]

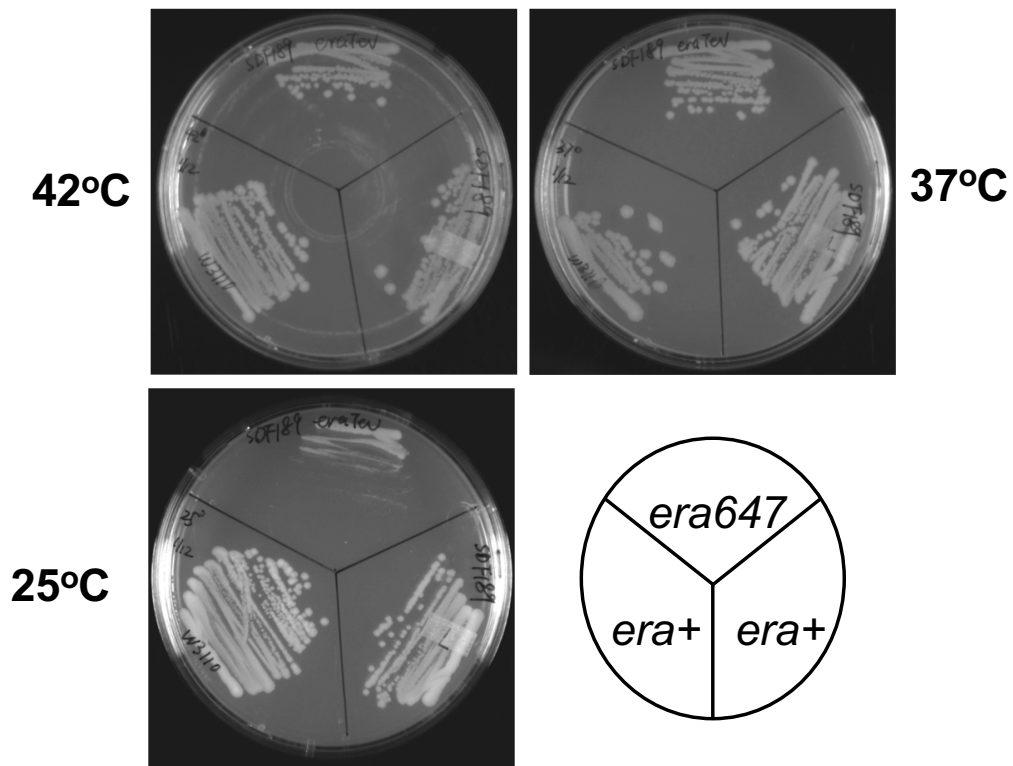

**Fig. S1. Cold sensitivity of cells with *era647* at the native *era* locus.** W3110 (*era+*), SDF189 (*era+*) or an *era647* derivative of SDF189 were streaked out on LB plates and incubated overnight at the temperatures indicated.

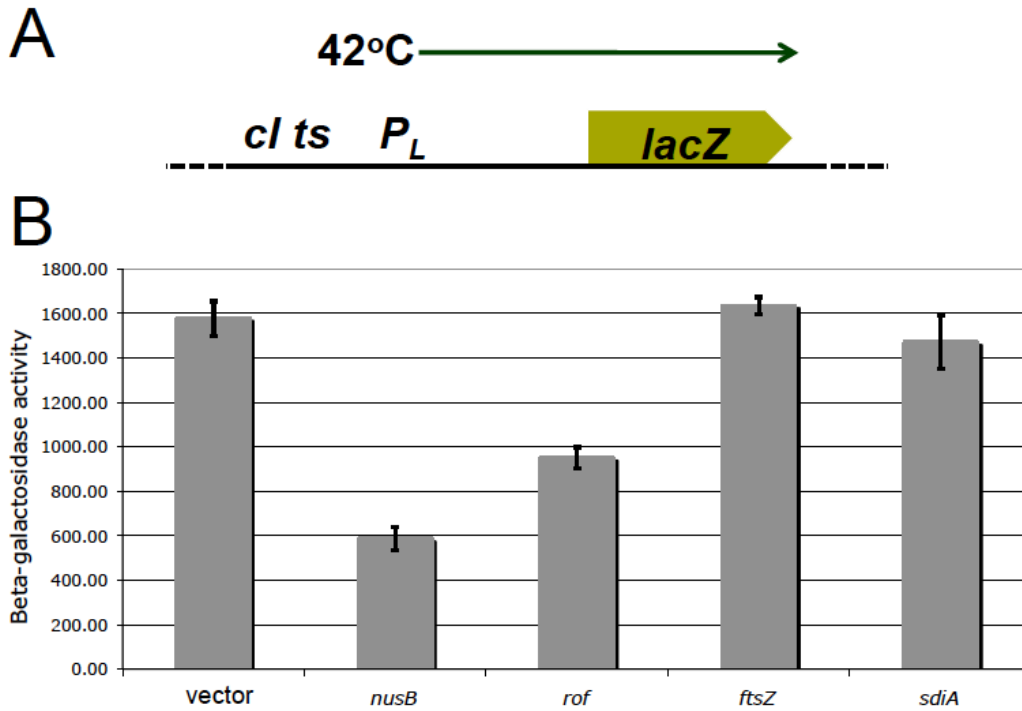

**Fig. S2. Suppressor effects on expression from the *pL* operon.**

The *lacZ* gene cloned to replace the *cIII* gene precisely at its ATG start codon (see Fig. S2) was used to measure  $\beta$ -galactosidase expression at 42°C in the presence of the different multicopy suppressor plasmids: The *nusB* gene on pXM14; the *rof* gene on pXM16; and the *ftsZ* gene on pXM15 the *sdiA* gene on pXM17. The pBR322 plasmid is the vector control. In the same assay without any plasmid, the *rho15 amp* mutant reduced expression to ~ 900 units of  $\beta$ -galactosidase. Units of activity were determined by the method of Miller (1).

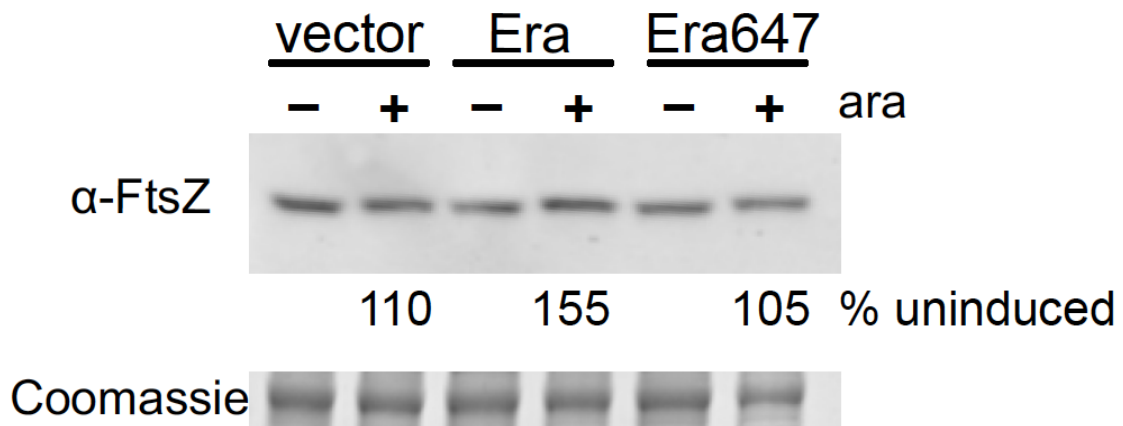

**Fig. S3. Inhibition of cell division by Era647 is not due to a decrease in cellular FtsZ levels.** Cultures of strains with pBAD30 vector, pBAD30-Era or pBAD30-Era647 were induced/not induced with 0.2% L-arabinose for 2 h at 30°C, at equivalent optical densities. Two replicates of the 6 obtained samples were subjected to SDS-PAGE and Coomassie staining (bottom) or Western blotting with anti-FtsZ (top). Band intensities for each Coomassie-stained lane were quantified using Image Lab software (BioRad) and used to calculate a relative loading ratio for each lane. The same software was used to quantify FtsZ band intensities on the Western blot, which were then divided by the lane-specific relative loading ratio to obtain normalized values. The percent changes of FtsZ levels between induced and uninduced samples (shown) were obtained by dividing the mean values from the arabinose-induced replicates for each set by the uninduced average for each set.

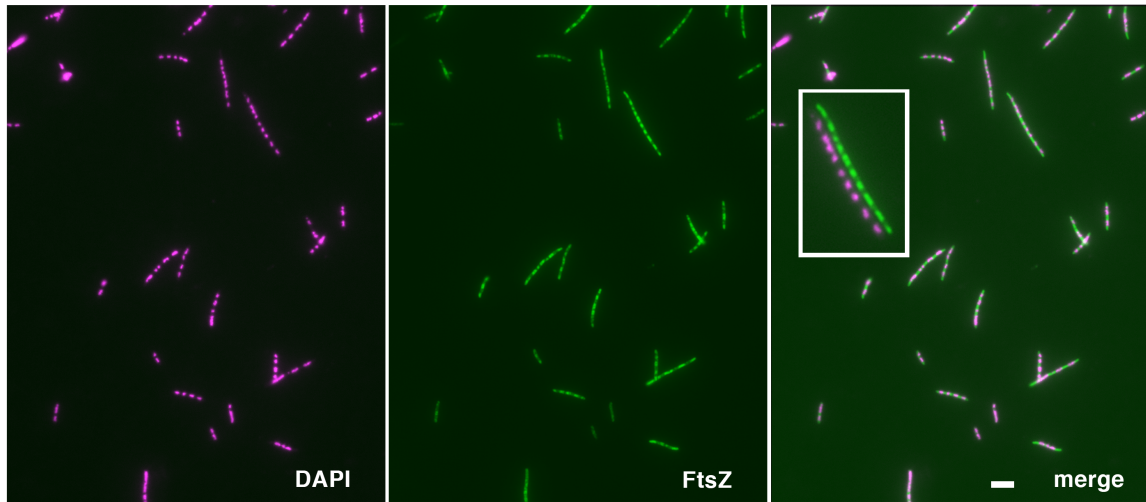

**Fig. S4. FtsZ delocalizes to inter-nucleoid spaces in response to Era647 overproduction.** TUC356 cells induced with L-arabinose for 2 h to overproduce Era647 were stained with DAPI to label nucleoids (magenta) or anti-FtsZ (green) as in Fig. 5, and the images were merged. The inset, magnified 2x, shows the DAPI and FtsZ channels from the longest visible filamentous cell in the field, in which one channel is spatially offset from the other to visualize the separate localization of FtsZ and nucleoids. Scale bar, 5  $\mu$ m.

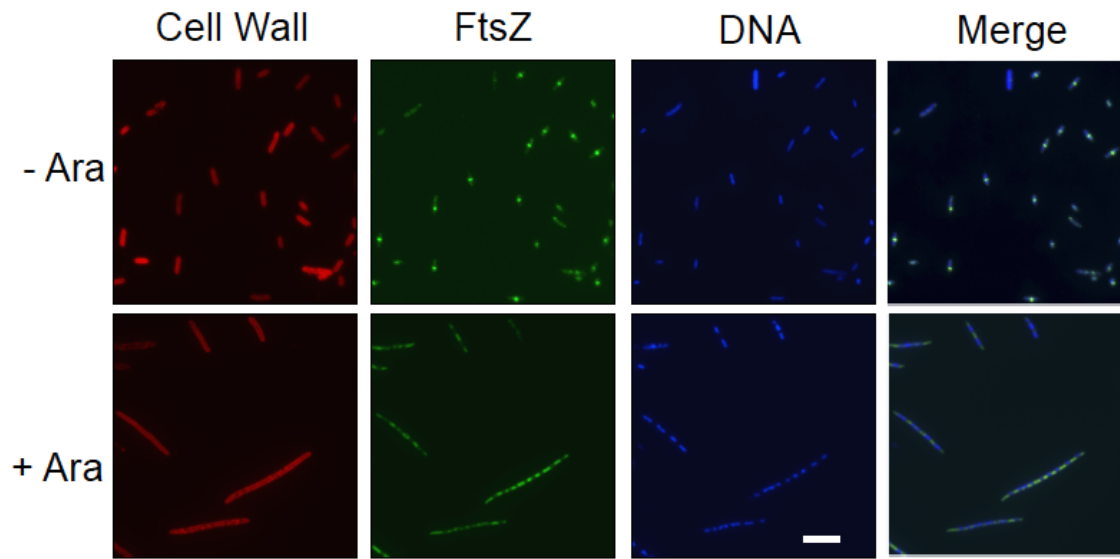

**Fig. S5. Effect of Era647 overproduction on FtsZ rings in cells grown in minimal glycerol medium.** Cells containing pBAD30 derivatives of Era or Era647 growing to early logarithmic phase in M63 glycerol were induced with L-arabinose (Ara) for 1 h, then fixed and stained with DAPI, fluorescent lectin, and immunostained with anti-FtsZ as described in Fig. 6. Scale bar, 5  $\mu$ m.

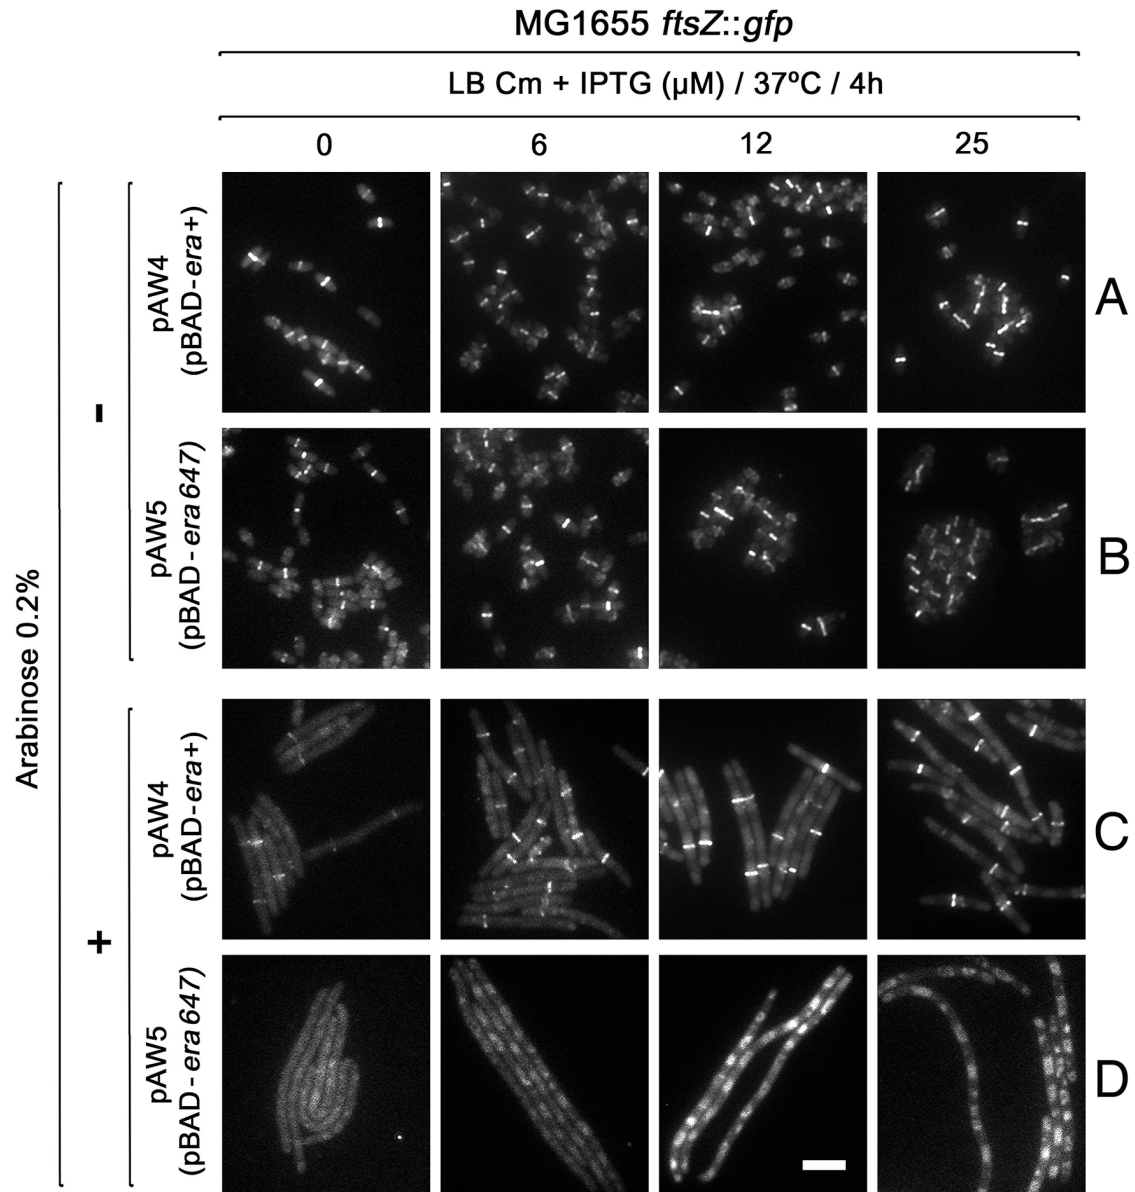

**Fig. S6. Localization of FtsZ-GFP in response to Era or Era647 overproduction.** MG1655 cells that express an ectopic *ftsZ-gfp* chromosomal fusion under IPTG control were transformed with either pAW4 (pBAD-*era*) or pAW5 (pBAD-*era647*) and grown in LB at 37°C to early-logarithmic phase. Cells were then induced with (rows B, D) or without (rows A, C) arabinose in either 0, 6, 12 or 25  $\mu$ M IPTG for 4 h, then placed on a slide with a thin layer of LB agarose and imaged by fluorescence microscopy. Scale bar, 5  $\mu$ m.

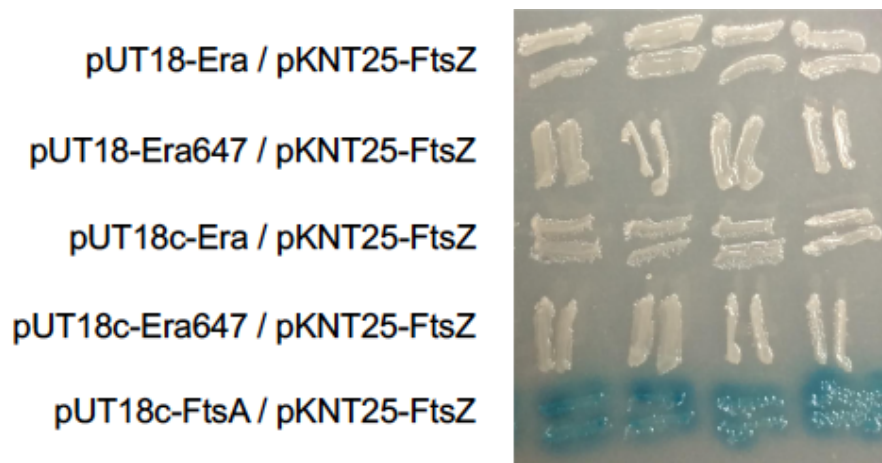

**Fig. S7. Bacterial two-hybrid assay for Era-FtsZ interactions.** Independent transformant colonies of BTH101 cells carrying the plasmid combinations shown were spotted onto LB supplemented with ampicillin, kanamycin, Xgal and 25  $\mu$ M IPTG and incubated overnight at 30°C, then photographed.

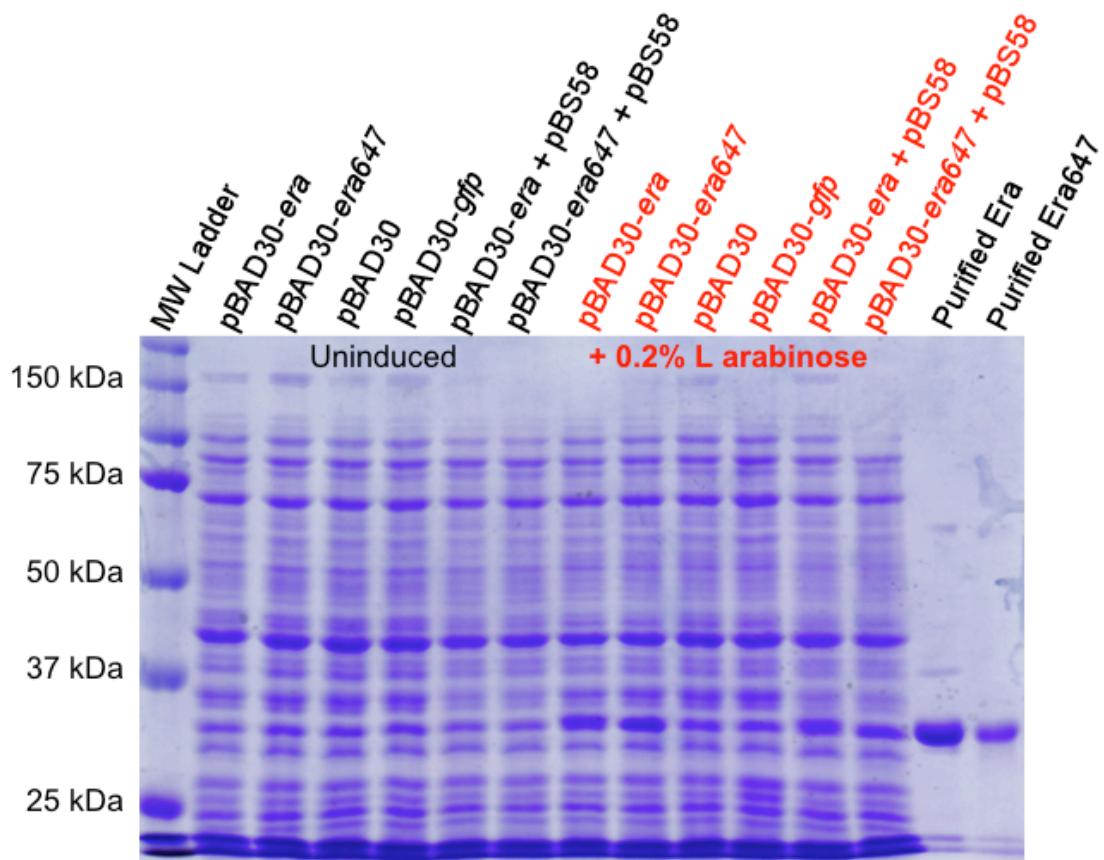

**Fig. S8. Overproduction, purification, and standardization of Era or Era647 protein.** Shown is a Coomassie-stained SDS polyacrylamide gel loaded with whole cell lysates of strains shown, normalized to OD<sub>600</sub>. The two rightmost lanes of the gel were also loaded with purified Era or Era647 protein. Molecular weight standards in kDa are shown to the left.



**Table S1. Bacterial strains and plasmids.**

| <b>Strain</b> | <b>Description or relevant genotype <sup>†</sup></b>          | <b>Source/reference</b> |
|---------------|---------------------------------------------------------------|-------------------------|
| W3110         | <i>E. coli</i> K-12                                           | Lab stock               |
| HME45         | W3110 <i>gal490 pglΔ8 λ int red cIII cl857Δ(cro-bioA)</i>     | (2)                     |
| SDF189        | W3110 <i>yfhB::ΔTn10-A17</i>                                  | (3)                     |
| HT120         | W3110 <i>rnc40:: ΔTn10</i>                                    | (4)                     |
| MG1655        | <i>E. coli</i> K-12                                           | Lab stock               |
| WM1074        | MG1655 <i>lac-</i>                                            | Lab stock               |
| MT79          | TB28 <i>leu::Tn10 ftsL*</i> (Fts <sub>LE88K</sub> )           | (5)                     |
| TUC01         | HME45 <i>λ int&lt;&gt;cat sacB red cIII cl857Δ(cro-bioA)</i>  | This work               |
| TUC03         | HME45 <i>λ (cat sacB-cIII)&lt;&gt;era+ cl857Δ(cro-bioA)</i>   | This work               |
| TUC05         | HME45 <i>λ (cat sacB-cIII)&lt;&gt;era647 cl857Δ(cro-bioA)</i> | This work               |
| TUC30         | TUC05 /pSIM5                                                  | This work               |
| TUC84         | TUC05 <i>λ cl857 cro+ lacZ</i> (Km <sup>r</sup> )             | This work               |
| TUC85         | TUC05 <i>λ cl857 cro27 lacZ</i> (Km <sup>r</sup> )            | This work               |
| TUC93         | SDF189 <i>P<sub>rnc</sub> era67</i>                           | This work               |
| TUC124        | W3110 <i>ftsZ84 P<sub>rnc</sub> era67</i>                     | This work               |
| TUC279        | TUC05 /pACS1                                                  | This work               |

---

|        |                                                                   |           |
|--------|-------------------------------------------------------------------|-----------|
| TUC303 | TUC05 <i>sulA</i> <> <i>cat</i>                                   | This work |
| TUC356 | W3110 /pHKP67 ( <i>P<sub>BAD</sub> era647</i> )                   | This work |
| TUC357 | TUC93 /pHKP67 ( <i>P<sub>BAD</sub> era647</i> )                   | This work |
| TUC358 | W3110 /pHKP60 ( <i>P<sub>BAD</sub> era<sup>+</sup></i> )          | This work |
| TUC359 | TUC93 /pHKP60 ( <i>P<sub>BAD</sub> era<sup>+</sup></i> )          | This work |
| TUC362 | W3110 <i>P<sub>rnc</sub> era647</i>                               | This work |
| TUC377 | TUC124 <i>P<sub>rnc</sub> era647</i>                              | This work |
| TUC382 | W3110 /pBAD30                                                     | This work |
| TUC383 | TUC93 /pBAD30                                                     | This work |
| TUC404 | TUC05 /pftsQAZ                                                    | This work |
| TUC412 | TUC05 /pJPB71                                                     | This work |
| TUC413 | TUC05 /pJPB223                                                    | This work |
| TUC414 | TUC05 /pSEB25                                                     | This work |
| TUC415 | TUC05 /pSEB162                                                    | This work |
| TUC421 | TUC223 /pftsQAZ                                                   | This work |
| TUC502 | HME45 $\lambda$ ( <i>cat sacB-cllI</i> )<> <i>lacZ</i>            | This work |
| TUC504 | TUC502 /pftsQAZ                                                   | This work |
| TUC540 | HME45 $\lambda$ ( <i>cat sacB-cllI</i> )<> <i>era<sup>+</sup></i> | This work |
| TUC605 | TUC05 /pBR322                                                     | This work |

---

---

|        |                                         |           |
|--------|-----------------------------------------|-----------|
| TUC606 | TUC05 /pXM14                            | This work |
| TUC607 | TUC05 /pXM15                            | This work |
| TUC609 | TUC05 /pXM16                            | This work |
| TUC610 | TUC05 /pXM17                            | This work |
| TUC612 | TUC502 /pBR322                          | This work |
| TUC613 | TUC502 /pXM14                           | This work |
| TUC614 | TUC502 /pXM15                           | This work |
| TUC616 | TUC502 /pXM16                           | This work |
| TUC617 | TUC502 /pXM17                           | This work |
| TUC619 | TUC124 /pBR322                          | This work |
| TUC620 | TUC124 pXM14                            | This work |
| TUC621 | TUC124 /pXM15                           | This work |
| TUC623 | TUC124 /pXM16                           | This work |
| TUC624 | TUC124 /pXM17                           | This work |
| TUC626 | TUC05 <i>rho15&lt;&gt;amp</i>           | This work |
| TUC630 | TUC502 <i>rho15&lt;&gt;amp</i>          | This work |
| TUC641 | TUC05 <i>ftsZ84</i> (Tet <sup>r</sup> ) | This work |
| TUC708 | MG1655 <i>lon::Tn10</i>                 | This work |
| TUC709 | MG1655 <i>lon::Tn10 sulA&lt;&gt;cat</i> | This work |

---

---

|        |                                                                |           |
|--------|----------------------------------------------------------------|-----------|
| WM5166 | MG1655 $\Delta(\lambda attL-lom)::bla lacI^q P_{trc}-ftsZ-gfp$ | (6)       |
| WM5570 | WM5166 /pAW5                                                   | This work |
| WM6233 | BW27783 <i>ftsZ</i> -mNG                                       | (7)       |
| WM6326 | WM6233 <i>ftsL* leuO::Tn10</i> (P1 X MT79)                     | This work |
| WM6530 | WM6326 /pAW5                                                   | This work |
| WM4915 | WM1074 <i>ftsZ* leuO::Tn10</i>                                 | (8)       |
| WM6529 | WM4915 /pAW5                                                   | This work |

| <b>Plasmid</b> | <b>Description</b>                                                                                  | <b>Source/reference</b> |
|----------------|-----------------------------------------------------------------------------------------------------|-------------------------|
| pSIM5          | pSC101 $\lambda cl857P_L\Delta(kil-N)$ (Cm <sup>r</sup> )                                           | (9)                     |
| pACS1          | pBR322 <i>P<sub>rnc</sub> rnc<sup>+</sup> era<sup>+</sup></i> (Amp <sup>r</sup> /Tet <sup>r</sup> ) | (4)                     |
| pBAD30         | pACYC184 (Amp <sup>r</sup> ) with <i>P<sub>araBAD</sub></i>                                         | (10)                    |
| pHKP60         | pBAD30 <i>P<sub>araBAD</sub> era<sup>+</sup></i> (Amp <sup>r</sup> )                                | This work               |
| pHKP67         | pBAD30 <i>P<sub>araBAD</sub> era647</i> (Amp <sup>r</sup> )                                         | This work               |
| pGB2           | pSC101 origin (Spc <sup>r</sup> )                                                                   | Lab stock               |
| pJPB71         | <i>ftsZ</i> cloned in pGB2 (Spc <sup>r</sup> )                                                      | (11)                    |
| pJPB223        | <i>ftsQAZ</i> cloned in pGB2 (Spc <sup>r</sup> )                                                    | (12)                    |

---

---

|               |                                                                        |           |
|---------------|------------------------------------------------------------------------|-----------|
| pSEB25        | <i>ftsQZ</i> is pJPB223 with <i>ftsA</i> deleted (Spc <sup>r</sup> )   | (12)      |
| pSEB162       | <i>ftsQA</i> is pJPB223 with <i>ftsZ</i> deleted (Spc <sup>r</sup> )   | (12)      |
| pBS58         | <i>ftsQAZ</i> cloned in pGB2 (Spc <sup>r</sup> )                       | (13)      |
| pXM14         | pBR322 <i>ribE<sup>+</sup>nusB<sup>+</sup></i> (Amp)                   | This work |
| pXM15         | pBR322 <i>ftsZ<sup>+</sup></i> (Amp)                                   | This work |
| pXM16         | pBR322 <i>rof<sup>+</sup>yaeP<sup>+</sup></i> (Amp)                    | This work |
| pXM17         | pBR322 <i>yecP<sup>+</sup>sdiA<sup>+</sup></i> (Amp)                   | This work |
| pBAD24Cm      | pBAD24 with CAT (Cm <sup>r</sup> ) replacing <i>bla</i>                | (10)      |
| pAW4          | pBAD24Cm- <i>P<sub>araBAD</sub> era<sup>+</sup></i> (Cm <sup>r</sup> ) | This work |
| pAW5          | pBAD24Cm- <i>P<sub>araBAD</sub> era647</i> (Cm <sup>r</sup> )          | This work |
| pKNT25-FtsZ   | <i>E. coli</i> FtsZ fused to the N terminus of adenylate cyclase T25   | (14)      |
| pUT18C-FtsA   | <i>E. coli</i> FtsA fused to the C terminus of adenylate cyclase T18   | (15)      |
| pUT18C-Era    | <i>E. coli</i> Era fused to the C terminus of adenylate cyclase T18    | This work |
| pUT18C-Era647 | <i>E. coli</i> Era647 fused to the C terminus of adenylate cyclase T18 | This work |
| pUT18-Era     | <i>E. coli</i> Era fused to the N terminus of adenylate cyclase T18    | This work |
| pUT18-Era647  | <i>E. coli</i> Era647 fused to the N terminus of adenylate cyclase T18 | This work |

---

† The insertion site of *yfhB::ΔTn10* A17 (4) has been determined here by Single Primer PCR analysis and sequencing (16).

**Table S2. Frequency of cells with Z rings in strains with pBAD30-*era* or pAD30-*era647*, as measured by anti-FtsZ immunofluorescence.**

| <b>Arabinose<sup>1</sup></b> | <b><i>era</i> allele</b> | <b>Cells with Z rings/total cells</b> | <b>% Cells with Z rings</b> |
|------------------------------|--------------------------|---------------------------------------|-----------------------------|
| 0%                           | <i>era</i>               | 73/108                                | 68%                         |
|                              | <i>era647</i>            | 54/65                                 | 83%                         |
| 0.2%                         | <i>era</i>               | 100/135                               | 74%                         |
|                              | <i>era647</i>            | 5/102                                 | 5%                          |

<sup>1</sup> log-phase cells were grown with or without arabinose for 2 h

## References

1. Miller JH. 1972. Experiments in molecular genetics. Cold Spring Harbor Laboratory.
2. Yu D, Ellis HM, Lee EC, Jenkins NA, Copeland NG, Court DL. 2000. An efficient recombination system for chromosome engineering in *Escherichia coli*. Proc Natl Acad Sci USA 97:5978–5983.
3. Dasgupta S, Fernandez L, Kameyama L, Inada T, Nakamura Y, Pappas A, Court DL. 1998. Genetic uncoupling of the dsRNA-binding and RNA cleavage activities of the *Escherichia coli* endoribonuclease RNase III--the effect of dsRNA binding on gene expression. Mol Microbiol 28:629–640.
4. Takiff HE, Chen SM, Court DL. 1989. Genetic analysis of the *rnc* operon of *Escherichia coli*. J Bacteriol 171:2581–2590.
5. Tsang M-J, Bernhardt TG. 2015. A role for the FtsQLB complex in cytokinetic ring activation revealed by an *ftsL* allele that accelerates division. Mol Microbiol 95:925–944.
6. Potluri L-P, de Pedro MA, Young KD. 2012. *Escherichia coli* low-molecular-weight penicillin-binding proteins help orient septal FtsZ, and their absence leads to asymmetric cell division and branching. Mol Microbiol 84:203–224.
7. Moore DA, Whatley ZN, Joshi CP, Osawa M, Erickson HP. 2017. Probing for binding regions of the FtsZ protein surface through site-directed insertions: Discovery of fully functional FtsZ-fluorescent proteins. J Bacteriol 199:e00553-16.
8. Haeusser DP, Rowlett VW, Margolin W. 2015. A mutation in *Escherichia coli* *ftsZ* bypasses the requirement for the essential division gene *zipA* and confers resistance to FtsZ assembly inhibitors by stabilizing protofilament bundling. Mol Microbiol 97:988–1005.
9. Datta S, Costantino N, Court DL. 2006. A set of recombineering plasmids for Gram-negative bacteria. Gene 379:109–115.
10. Guzman LM, Belin D, Carson MJ, Beckwith J. 1995. Tight regulation, modulation, and high-level expression by vectors containing the arabinose PBAD promoter. J Bacteriol 177:4121–4130.
11. Tétart F, Bouché JP. 1992. Regulation of the expression of the cell-cycle gene *ftsZ* by DicF antisense RNA. Division does not require a fixed number of FtsZ molecules. Mol Microbiol 6:615–620.
12. Pichoff S, Lutkenhaus J. 2001. *Escherichia coli* division inhibitor MinCD blocks septation by preventing Z-ring formation. J Bacteriol 183:6630–6635.
13. Beall B, Lowe M, Lutkenhaus J. 1988. Cloning and characterization of *Bacillus subtilis* homologs of *Escherichia coli* cell division genes *ftsZ* and *ftsA*. J Bacteriol 170:4855–4864.

14. Karimova G, Dautin N, Ladant D. 2005. Interaction network among *Escherichia coli* membrane proteins involved in cell division as revealed by bacterial two-hybrid analysis. *J Bacteriol* 187:2233–2243.
15. Shiomi D, Margolin W. 2007. Dimerization or oligomerization of the actin-like FtsA protein enhances the integrity of the cytokinetic Z ring. *Mol Microbiol* 66:1396–1415.
16. Kofoed E, Rappleye C, Stojiljkovic I, Roth J. 1999. The 17-gene ethanolamine (eut) operon of *Salmonella typhimurium* encodes five homologues of carboxysome shell proteins. *J Bacteriol* 181:5317–5329.
